# Supplementary material for: IL-33 promotes innate lymphoid cell-dependent IFN-γ production required for innate immunity to Toxoplasma gondii
Source: eLife. 2021 Apr 30;10:e65614. doi: 10.7554/eLife.65614 (PMC8121546; doi:10.7554/eLife.65614)
Supplement: Figure 1—source data 1. [file elife-65614-fig1-data1.xlsx]

## Sheet: Sheet1
Source Data
Figure 1
A		WT	WT	WT	Rag1-/-	Rag1-/-
IL-33 in peritoneum		Naive	Infected	+α-IFNγ	Infected	+α-IFNγ
		0	0	59.889	0	36.99
		0	0	53.687	0	99.532
		0	0	57.504	0	1.209
			0	142.42	3.041	65.952
			0	17.43	21.593	80.051
					6.913	84.454
					9.665
					4.471
					39.117
					42.092
					48.044
					31.678
B		Parasite DNA	IL-33
		0.778	57.504
		0.509	17.43
		0.0763	0
		0.0531	0
		0.966	36.99
		1.22	99.532
		0.00208	1.209
		0.246	39.117
		0.191	42.092
		0.31	48.044
		0.249	31.678
		0.396	23.247
		0.445	39.613
		0.475	44.572
C		Naive	CPS	Infected
IL-33 in liver punches		7.925	84	101.76
		8.86	102	109.21
		55.438	67	130.9
		0	60	157
		16	52	549
		0		502
		0		316
		26		246
		52
		71
		83
