# Supplementary material for: IL-33 promotes innate lymphoid cell-dependent IFN-γ production required for innate immunity to Toxoplasma gondii
Source: eLife. 2021 Apr 30;10:e65614. doi: 10.7554/eLife.65614 (PMC8121546; doi:10.7554/eLife.65614)
Supplement: Figure 2—source data 1. [file elife-65614-fig2-data1.xlsx]

## Sheet: Sheet1
Source Data
Figure 2
B top right		WT				Il33-/-				Il1rl1-/-
% IL-33R+	Naive	3.18				1.72				0
	Infected	18	13.4	17.9		26	27.9	17.4	26.9	0.96
B bottom right		WT	Il33-/-
IL-33R MFI		456	535
		469	552
		506	486
			531
					1ng IL-12	1ng IL-12	1ng IL-12
D top right		Media	IL-33	1 ng IL-12	1 ng IL-33	5 ng IL-33	10 ng IL-33
IFN-g (ng/mL)
		0	0	21.885	39.48	41.02	63.055
		1.21	0	27.865	38.285	51.61	84.925
		2.235	2.235	37.09	47.17	57.76	89.195
		0.87	0.87	31.28	49.39	58.1	85.265
		0	0	29.23	37.945	52.295	79.115
		0	0	27.52	41.02	43.41	75.015
D bottom right		Unstimulated	0.006
IFN-g (ng/mL)		IL-33	1.328
		IL-12	0.768
		IL-12 + 1ng IL-33	3.778
		IL-12 + 5ng IL-33	9.354
		IL-12 + 10ng IL-33	13.278
C
