# Supplementary material for: IL-33 promotes innate lymphoid cell-dependent IFN-γ production required for innate immunity to Toxoplasma gondii
Source: eLife. 2021 Apr 30;10:e65614. doi: 10.7554/eLife.65614 (PMC8121546; doi:10.7554/eLife.65614)
Supplement: Figure 3—source data 1. [file elife-65614-fig3-data1.xlsx]

## Sheet: Sheet1
Source Data
Figure 3
A		Rag1-/-	Rag1-/- Il1rl1-/-
% infected cells		27.7	49.5
		10.6	18.6
		7.5	30.5
		16.5	40.8
		8	38
		Peritoneum				Liver
B		Rag1-/-	Rag1-/- Il1rl1-/-			Rag1-/-	Rag1-/- Il1rl1-/-
Parasite DNA		0.246	0.396			0.0147	0.0468
		0.191	0.445			0.0139	0.0308
		0.156	0.475			0.011	0.0465
		0.31				0.0171	0.024
		0.249				0.0172
C			Rag1-/-					Rag1-/- Il1rl1-/-
Serum cytokines		IL-12	15.119	15.593	10.351	14.172	12.076	22.087	16.844	10.215	14.544
		IFN-γ	12.387	12.56	16.033	10.858	13.462	0.485	4.814	1.382	0.822	1.909
D			Rag1-/-					Rag1-/- Il1rl1-/-
Liver cell counts		NK Cells	33020	18468	55772	36808		16191	16610	18306	10296
		ILC1s	11176	8748	13724	13072		3855	2506	2938	3168
E		Rag1-/-	Rag1-/- Il1rl1-/-
Liver monocytes		9510	8640
		32000	19800
		28800	24600
		44900	8180
F			Rag1-/-				Rag1-/- Il1rl1-/-
% iNOS+		Uninfected	1.1	3.27	1.25	2.33	1.42	1.68	1.22	0.55
		Infected	10.8	16.7	10.6	11.8	4.38	3.18	4.09	3.25
Figure 3- supplement 1
A			WT					Il33-/-
Serum cytokines		IL-12	15.119	14.115	15.96	16.37	13.505	15.96	15.55	20.535	23.845
		IFN-γ	12.387	9.74	10.59	8.55	14.82	4.46	8.78	7.79	4.87
C		Rag1-/-	Rag1-/- Il1rl1-/-
# neutrophils		150100	1860000
		529750	766080
		574750	844550
		354195	1087800
		443025	668220
