# Supplementary material for: IL-33 promotes innate lymphoid cell-dependent IFN-γ production required for innate immunity to Toxoplasma gondii
Source: eLife. 2021 Apr 30;10:e65614. doi: 10.7554/eLife.65614 (PMC8121546; doi:10.7554/eLife.65614)
Supplement: Figure 4—source data 1. [file elife-65614-fig4-data1.xlsx]

## Sheet: Sheet1
Source Data
Figure 4
A		PBS	1ug IL-33	5ug IL-33
% infected cells		17.14	4.07	8.82
		31.21	12.66	3.8
		15.78	10.57	0
		32.78		0.92
		10.38		0
		16.25		7.76
		18.96		2.07
D		Liver Monocytes (x10^4)			Liver % iNOS+
Monocyte analysis		PBS	IL-33		PBS	IL-33
		0.1	2.11		2.26	10.1
		0.21	1.31		2.63	14
		0.46	1.77		5.27	13.2
			1.07			6.75
		Lung Monocytes (x10^4)			Lung %iNOS+
		PBS	IL-33		PBS	IL-33
		2.27	16.28		1.12	26.6
		2.45	11.02		2.88	13.5
		2.74	9.59		5.07	18.1
			17.23			11.1
C
