# Supplementary material for: IL-33 promotes innate lymphoid cell-dependent IFN-γ production required for innate immunity to Toxoplasma gondii
Source: eLife. 2021 Apr 30;10:e65614. doi: 10.7554/eLife.65614 (PMC8121546; doi:10.7554/eLife.65614)
Supplement: Figure 5—source data 1. [file elife-65614-fig5-data1.xlsx]

## Sheet: Sheet1
Source Data
Figure 5
A		PBS	IL-33	+ αp40	+αIFN-γ	Il2rg-/- PBS	Il2rg-/- IL-33
% infected cells		6.9	2	70	86	54.5	18.7
		7.1	1.58	61	70	53.6	34.3
		10.9	0	75.8	83	26.9	48.4
		9.6	0	81.3	73.5	22.9	25.9
			3.7	77	66	46.3	50.7
						55.2	39.1
						41.7	44.8
B		PBS	IL-33	Il2rg-/- PBS	Il2rg-/- IL-33
IFN-g (ng/mL)		0.971	1.458	0.511	1.732
		1.226	3.151	0.577	0.525
		0.47	2.794	1.396	1.568
		1.568	2.046	0.682	0.85
		0.376	1.452	0.67	0.456
C	top right		PBS					IL-33
# cells		NK Cells		149000	85800	200000	207000		660000	170000	354000	328000
		ILC1s		31200	20900	32000	34900		197000	47400	89000	61300
	bottom right		NK Cells					ILC1s
IFN-g MFI		PBS	5998	7163	5913	6318		6170	7307	6502	6679
		IL-33	6940	8380	8178	7781		7148	8468	7766	8209
C
