# Supplementary figures and images for: IL-33 promotes innate lymphoid cell-dependent IFN-γ production required for innate immunity to Toxoplasma gondii
Source: eLife journal article supplement (doi:10.7554/elife.65614), 2021-04-30

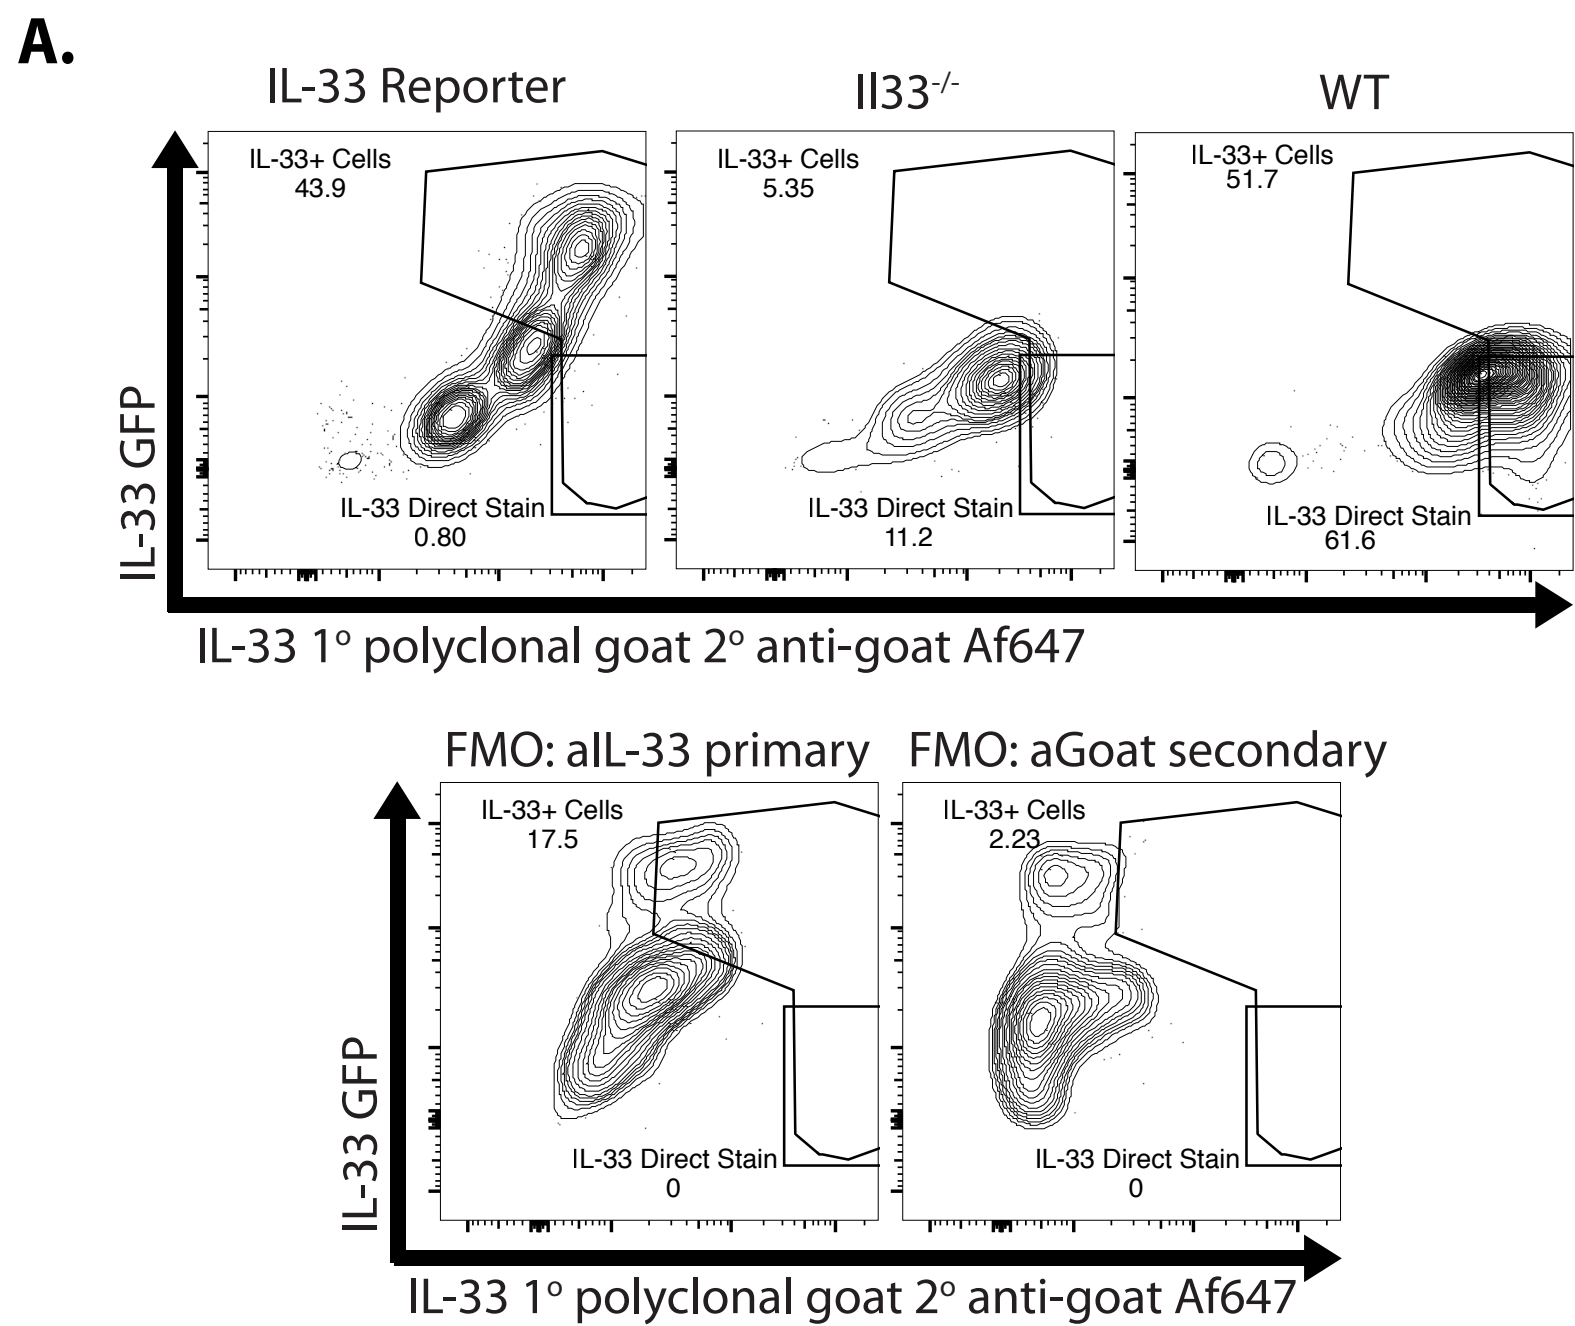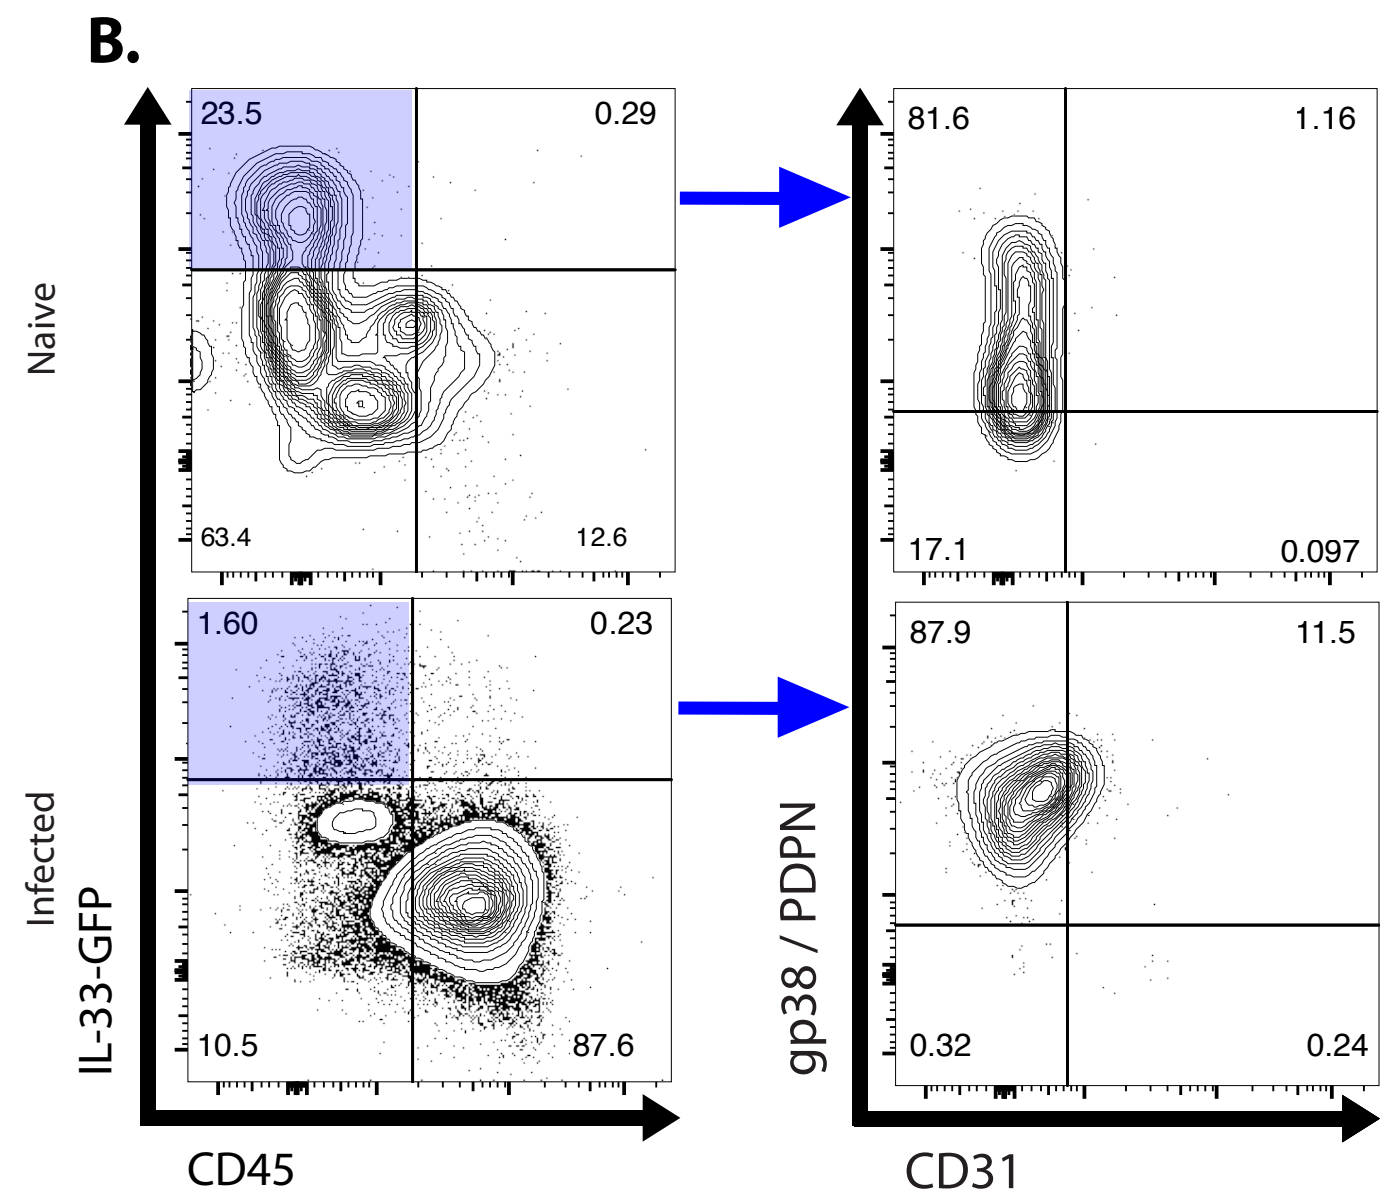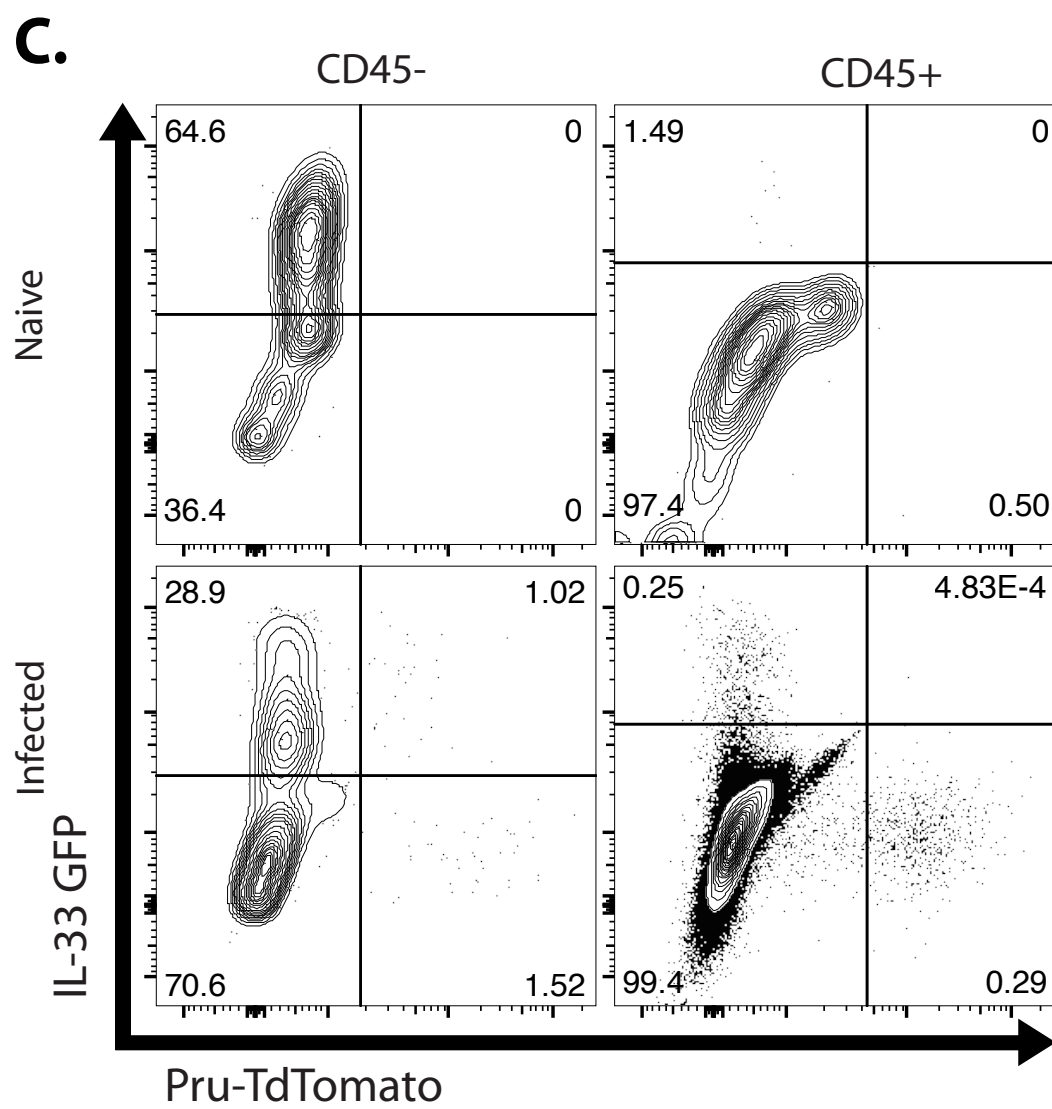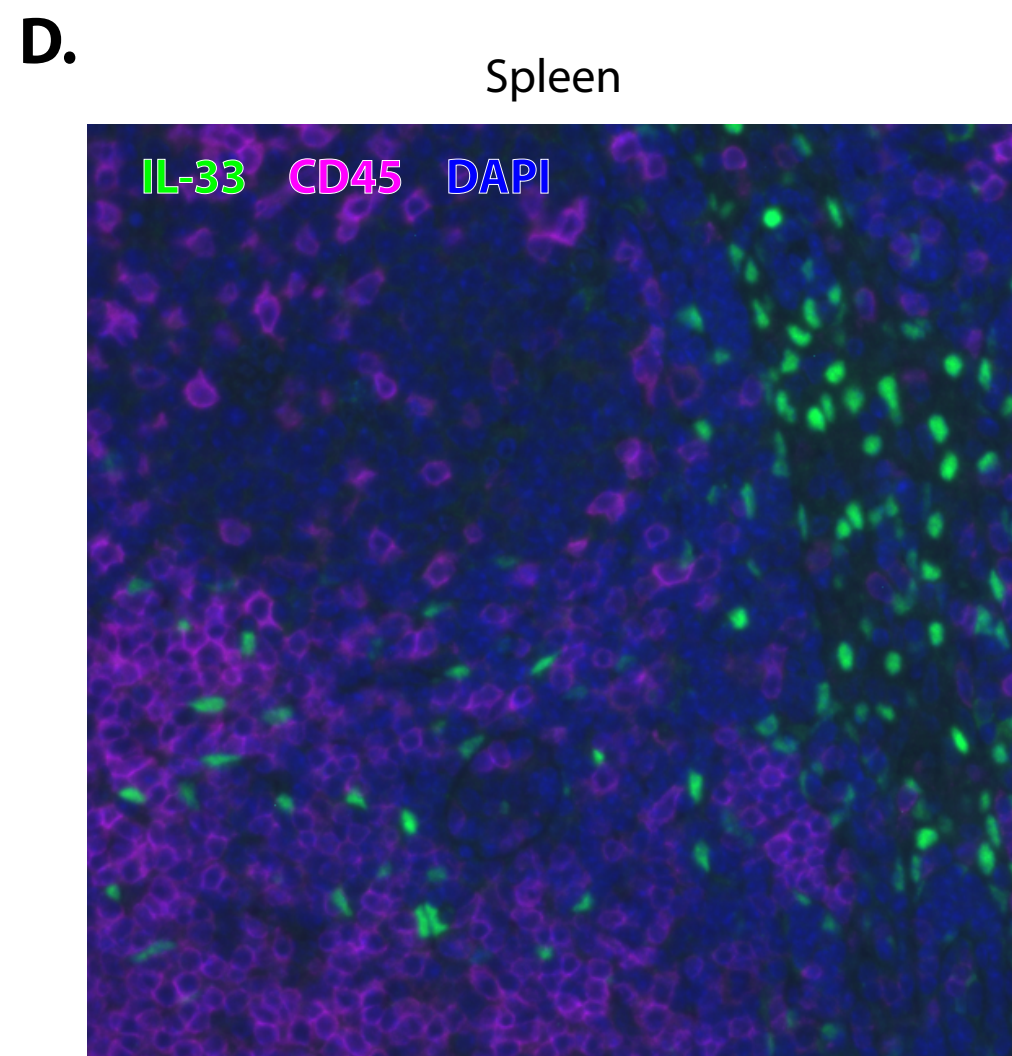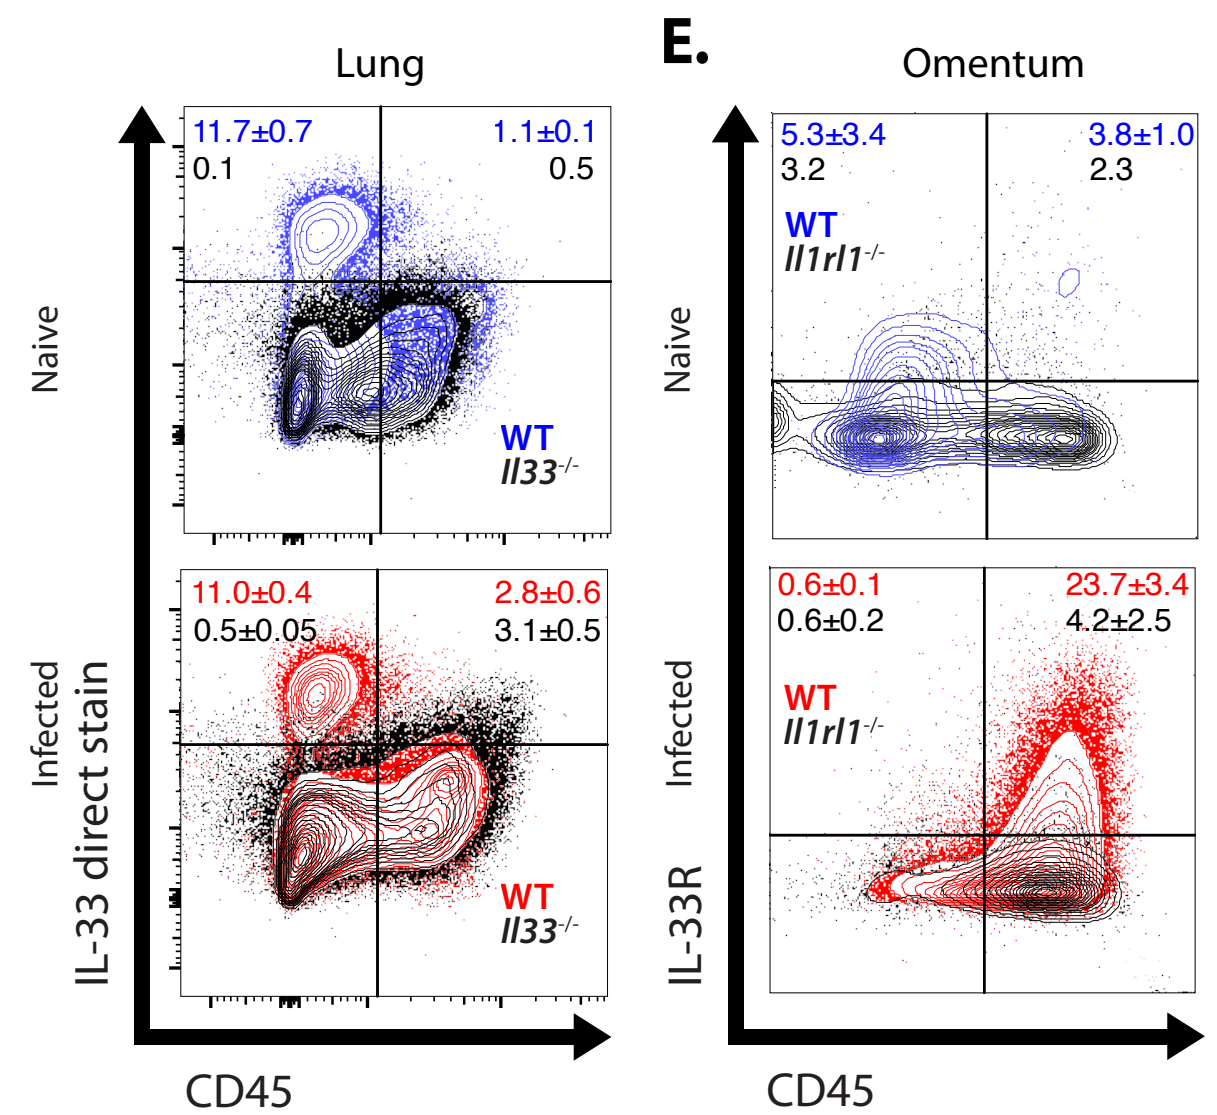

Supplement: supp [file elife_poa_e65614_Figure_1_figure_supplement_1.pdf › elife_poa_e65614_Figure_1_figure_supplement_1.pdf]

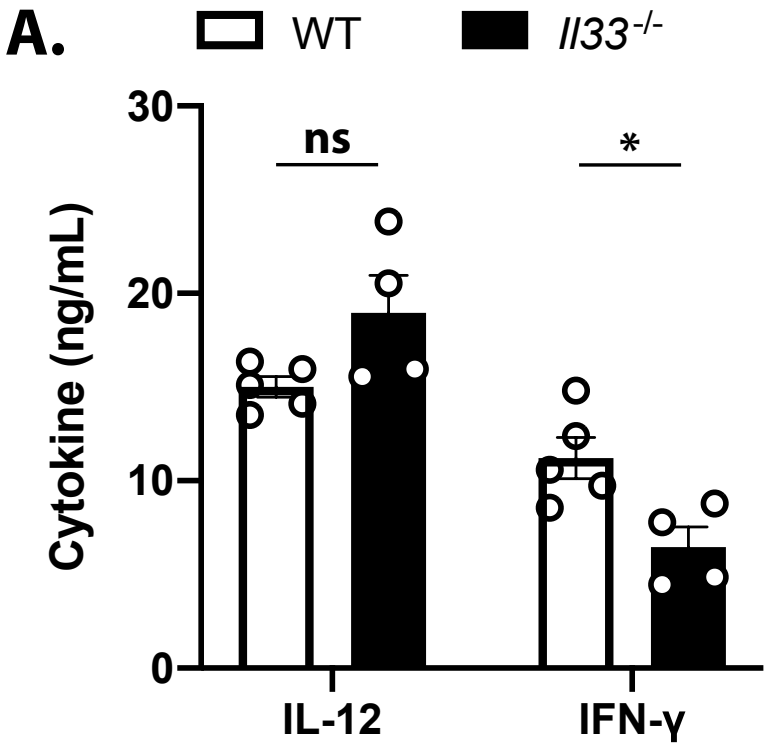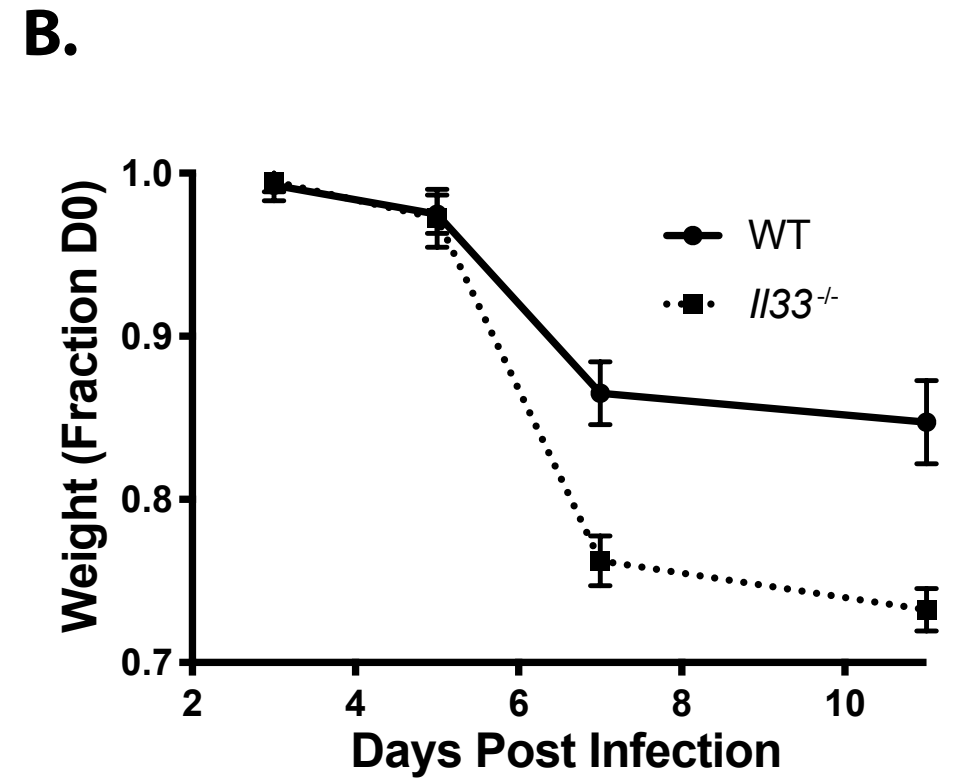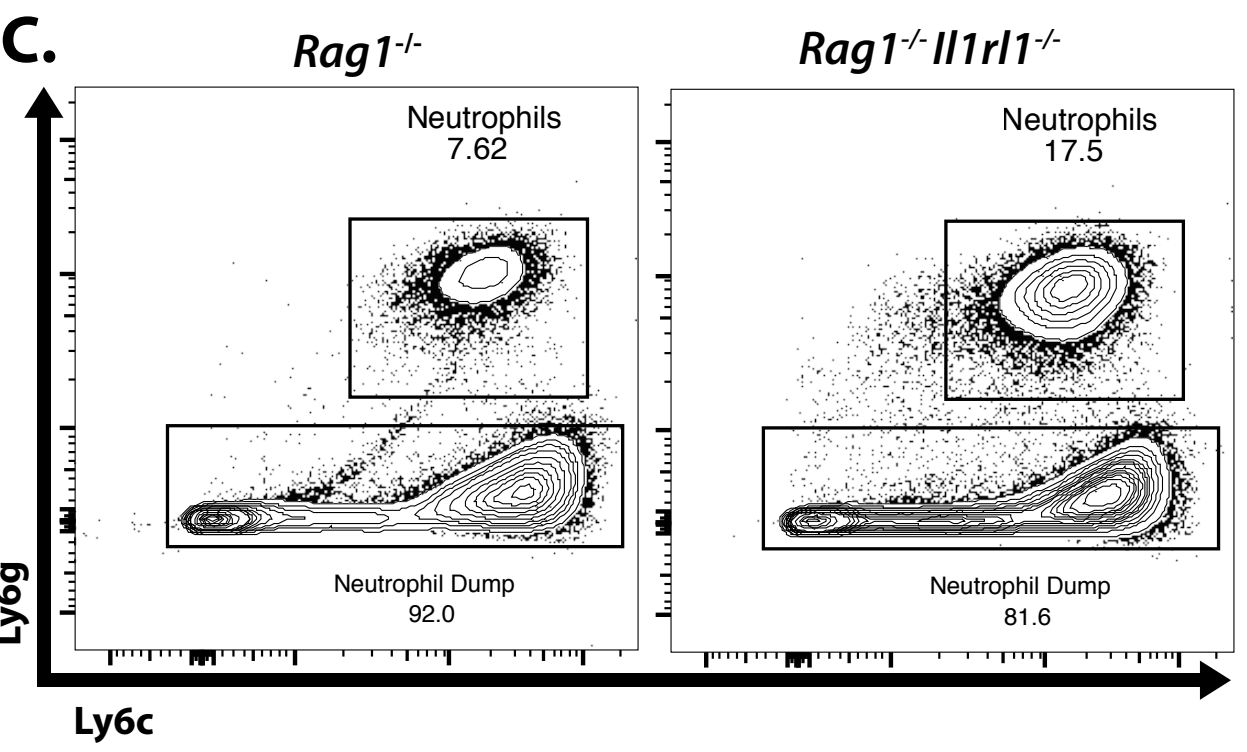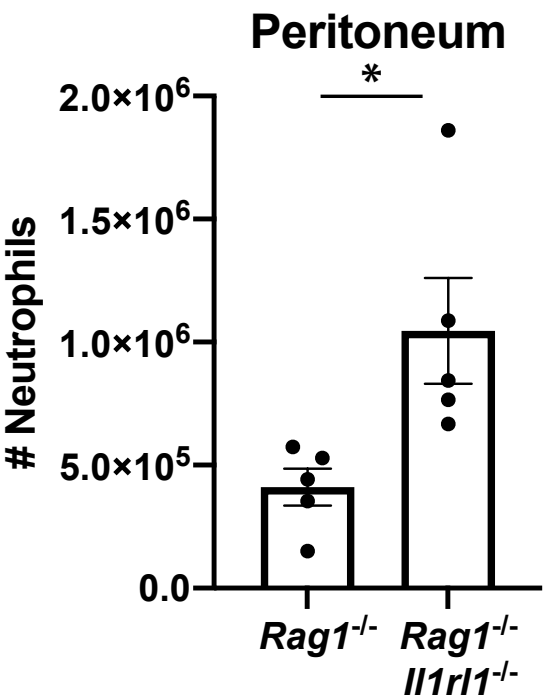

Supplement: supp [file elife_poa_e65614_Figure_3_figure_supplement_1.pdf › elife_poa_e65614_Figure_3_figure_supplement_1.pdf]
